# Supplementary material for: Formation of chloroplast protrusions and catalase activity in alpine Ranunculus glacialis under elevated temperature and different CO2/O2 ratios
Source: PubMed Central journal article supplement (PMC4628086; doi:10.1007/s00709-015-0778-5), 2015-02-21

**Suppl. 1** Spectral transmittance ( $\Psi$ ) of Plexiglas® XT Clear 29070 (thickness: 3 mm) in the ultraviolet and visible range (after data from Röhm, Darmstadt, Germany)

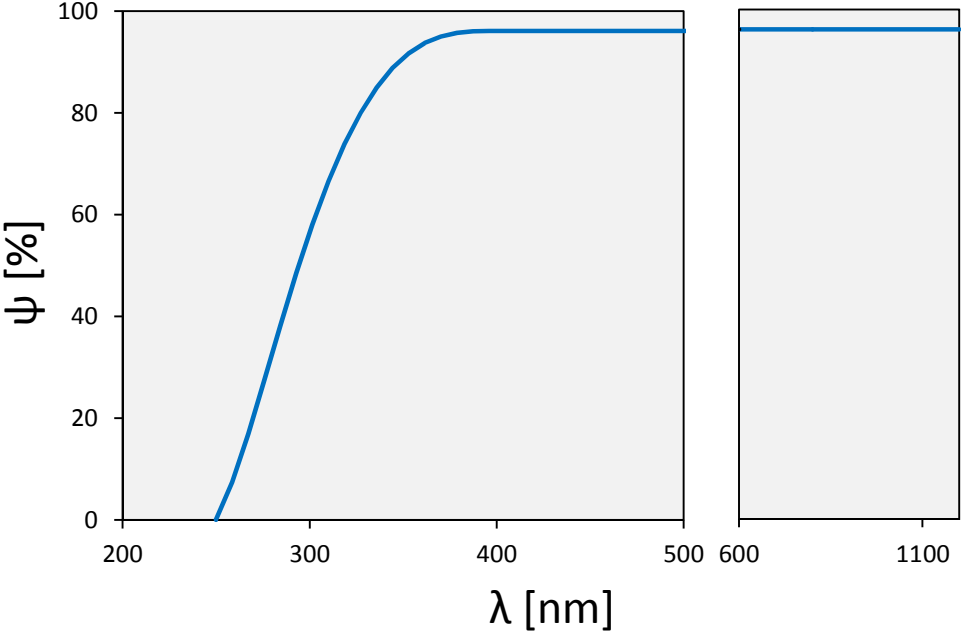

Supplement: 709_2015_778_MOESM1_ESM.pdf [file 709_2015_778_MOESM1_ESM.pdf]
